# Supplementary material for: Antioxidants Abrogate Alpha-Tocopherylquinone-Mediated Down-Regulation of the Androgen Receptor in Androgen-Responsive Prostate Cancer Cells
Source: PubMed Central journal article supplement (PMC4795544; doi:10.1371/journal.pone.0151525), 2016-03-17

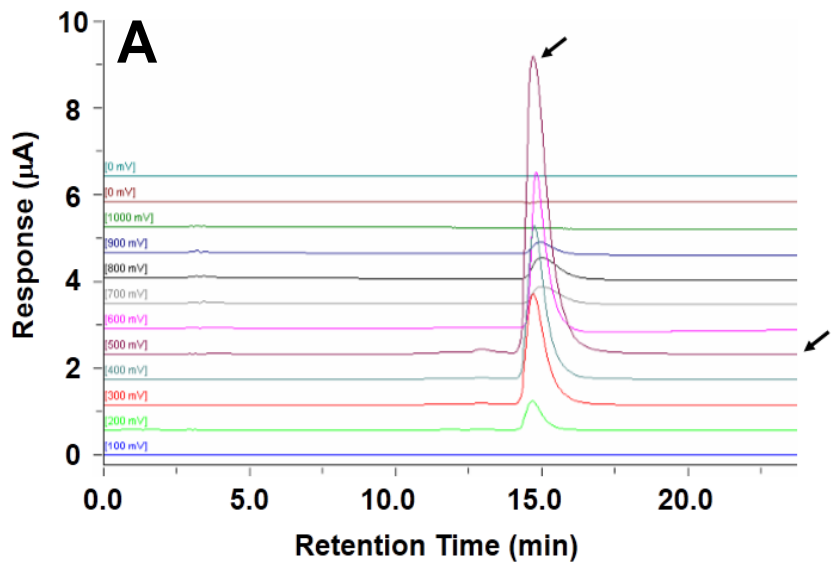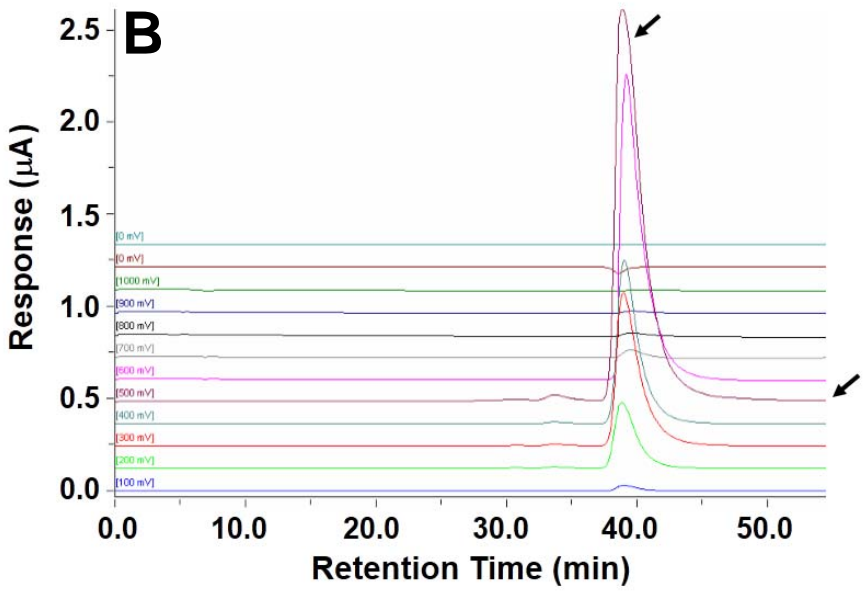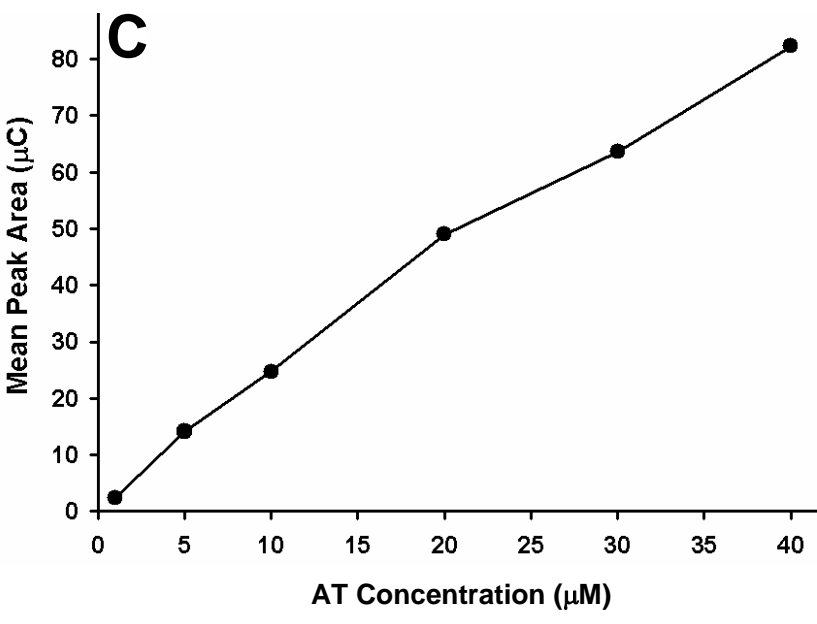

Supplement: pone.0151525.s001.pdf [file pone.0151525.s001.pdf]
