# Supplementary material for: Antioxidants Abrogate Alpha-Tocopherylquinone-Mediated Down-Regulation of the Androgen Receptor in Androgen-Responsive Prostate Cancer Cells
Source: PubMed Central journal article supplement (PMC4795544; doi:10.1371/journal.pone.0151525), 2016-03-17
Supplement: pone.0151525.s002.pdf [file pone.0151525.s002.pdf]

## Supplemental Material

**Table S1:** Quantitative PCR primer sequences

| <b>Gene (Abbreviation)</b>                                 | <b>Primer Direction</b> | <b>Primer Sequence (from 5' to 3')</b> |
|------------------------------------------------------------|-------------------------|----------------------------------------|
| <i>Androgen Receptor (AR)</i>                              | Forward                 | TCCTGGACTCCGTGCAGCCTATT                |
| <i>Androgen Receptor</i>                                   | Reverse                 | CCGGAAAGTCCACGCTCACCAT                 |
| <i>FK506 Binding Protein 5 (FKBP5)</i>                     | Forward                 | GAACCTGGCCATGTGCTACCTGA                |
| <i>FKBP5</i>                                               | Reverse                 | GCTGGGCTTCACCCCTCCTAT                  |
| <i>Forkhead Box A1(FOXA1)</i>                              | Forward                 | GCATGAAACCAGCGACTGGAACA                |
| <i>Forkhead Box A1</i>                                     | Reverse                 | GCTGACCGGGACGGAGGAGTA                  |
| <i>Kallikrein 2 (KLK2)</i>                                 | Forward                 | CTGGGCTCTGGACAGGTGGTAAA                |
| <i>Kallikrein 2</i>                                        | Reverse                 | TACAGACAAGTGGACCCCCAGAAT               |
| <i>NKX3.1 (NKX3-1)</i>                                     | Forward                 | GGCCGAGACGCTGGCAGAGA                   |
| <i>NKX3.1</i>                                              | Reverse                 | GGGCGCCTGAAGTGTTTTTCAGAGT              |
| <i>Prostate Specific Antigen (PSA; KLK3)</i>               | Forward                 | CGCTGGACAGGGGGCAAAA                    |
| <i>Prostate Specific Antigen</i>                           | Reverse                 | ACAAGTGGGCCCCCAGAATCA                  |
| <i>Prostate Specific Membrane Antigen (PSMA; FOLH1)</i>    | Forward                 | TCAGTGAGAGACTCCAGGACTTTGACA            |
| <i>PSMA</i>                                                | Reverse                 | GTTGTGGCTGCTTGGAGCATAGAT               |
| <i>Prostatic Acid Phosphatase (ACPP)</i>                   | Forward                 | CTTCTTGCCACTTGACGGAATTGT               |
| <i>Prostatic Acid Phosphatase</i>                          | Reverse                 | GTGCTGCGTCTCATTCCGGTAGTA               |
| <i>Prostein (SLC45A3)</i>                                  | Forward                 | CCTCCCTCTACCACCGGGAGAA                 |
| <i>Prostein</i>                                            | Reverse                 | CCCTCGGTATTTGGGCAGGAA                  |
| <i>Retinoid X Receptor, alpha (RXR<math>\alpha</math>)</i> | Forward                 | GTGGAGGCGCTGAGGGAGAA                   |
| <i>Retinoid X Receptor, alpha</i>                          | Reverse                 | GGCAGGCGGAGCAAGAGCTTA                  |
| <i>TM4SF1</i>                                              | Forward                 | CCCTCGGCCAGTGGA ACTACA                 |
| <i>TM4SF1</i>                                              | Reverse                 | GCACTCGGACCATGTGGAGGTAT                |
